# Supplementary material for: Long-term observations of cloud condensation nuclei in the Amazon rain forest – Part 1: Aerosol size distribution, hygroscopicity, and new model parametrizations for CCN prediction
Source: Copernicus journal article supplement (doi:10.5194/acp-16-15709-2016), 2016-12-20
Supplement: Supplementary file 1 [file acp-16-15709-2016-supplement.zip]

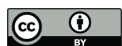

## *Supplement of*

# **Long-term observations of cloud condensation nuclei in the Amazon rain forest – Part 1: Aerosol size distribution, hygroscopicity, and new model parametrizations for CCN prediction**

**Mira L. Pöhlker al.**

*Correspondence to:* Mira L. Pöhlker (m.pohlker@mpic.de)

- [acp-16-15709-2016-supplement-title-page.pdf](#)
- [Pohlker\\_ACP\\_2016\\_NASA Ames.dat](#)

The copyright of individual parts of the supplement might differ from the CC-BY 3.0 licence.
